Figure S3

$\alpha_4\beta_7^{\text{high}}$  CD4<sup>+</sup> T cells

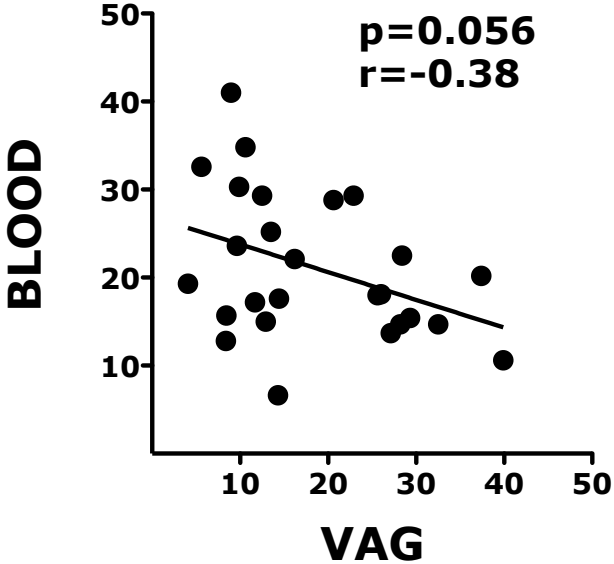

Source: https://storage.googleapis.com/plos-corpus-prod/10.1371/journal.ppat.1004567/1/ppat.1004567.s003.pdf
