Figure S4

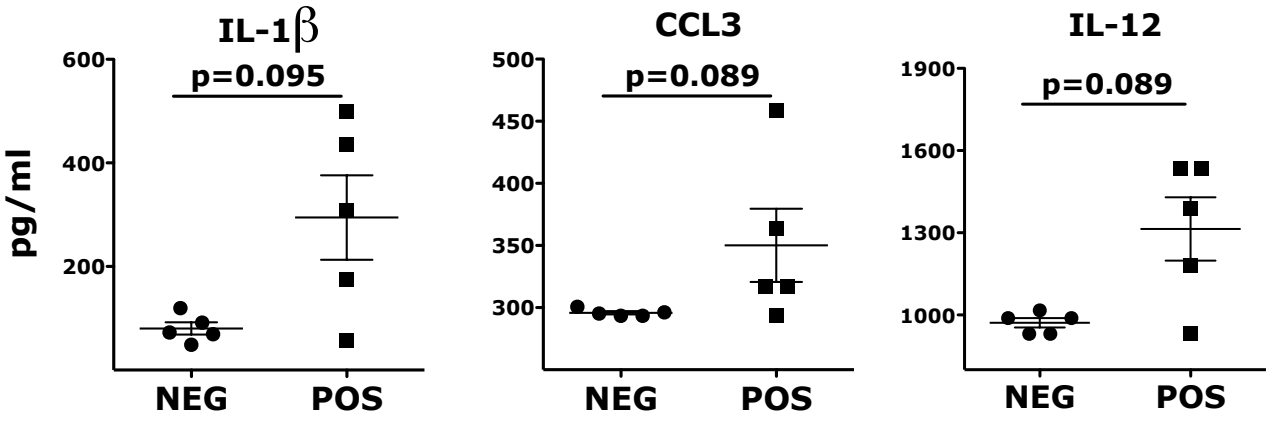

Source: https://storage.googleapis.com/plos-corpus-prod/10.1371/journal.ppat.1004567/1/ppat.1004567.s004.pdf
