# Supplementary material for: HSV-2-Driven Increase in the Expression of α4β7 Correlates with Increased Susceptibility to Vaginal SHIVSF162P3 Infection
Source: PLOS journal article supplement (doi:10.1371/journal.ppat.1004567), 2014-12-18

Figure S1

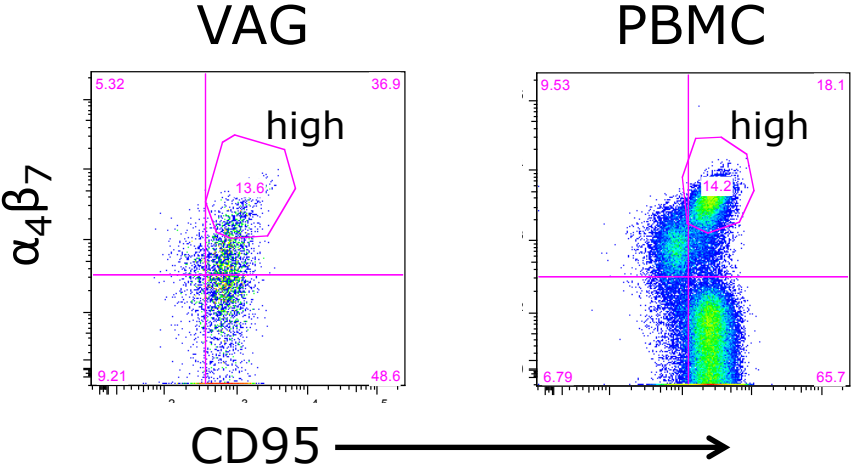

Supplement: S1 (10.1371/journal.ppat.1004567.s001) [file journal.ppat.1004567.s001]
